# Supplementary material for: Mutated variant of Candida antarcticalipase B in (S)-selective dynamic kinetic resolution of secondary alcohols
Source: Royal Society of Chemistry journal article supplement (doi:10.1039/c0ob00748j), 2010-11-01
Supplement: c0ob00748j.pdf [file c0ob00748j.pdf]

## *Electronic Supplementary Information*

### Mutated variant of *Candida antarctica* lipase B in (*S*)-selective dynamic kinetic resolution of secondary alcohols

*Karin Engström,<sup>a</sup> Michaela Vallin,<sup>b</sup> Per-Olof Syrén,<sup>b</sup> Karl Hult<sup>b</sup> and Jan-E. Bäckvall\*<sup>a</sup>*

<sup>a</sup>Department of Organic Chemistry, Arrhenius Laboratory, Stockholm University, SE-106 91  
Stockholm, Sweden

<sup>b</sup>Department of Biochemistry, School of Biotechnology, Royal Institute of Technology  
(KTH), AlbaNova University Center, SE-10 691 Stockholm, Sweden

jeb@organ.su.se

### **Experimental section**

Unless otherwise mentioned, all chemicals, were purchased from commercial sources. All reactions were performed in dry glassware under an argon atmosphere. <sup>1</sup>H and <sup>13</sup>C NMR spectra were recorded at 400 MHz and 100 MHz respectively using a Bruker Avance II spectrometer. Enantiomeric excess was determined by chiral gas chromatography using a CP-Chirasil-DEX CB column (25 m Ø \* 0.32 mm).

Isopropenyl acetate was dried over CaCl<sub>2</sub>, distilled and stored over molecular sieves. 1-Phenylheptanol was prepared by NaBH<sub>4</sub>-reduction of the corresponding ketone. Ruthenium catalyst **4** was prepared according to a literature procedure.<sup>1</sup> CalB W104A was prepared as previously described, and the enzyme load on the resin was 0.26 %.<sup>2</sup> The enzyme load of the commercially available CalB (Novozym 435) is approximately 3 %.

### **Kinetic resolution of 1-phenylpropanol**

**1a** (30 mg, 0.25 mmol) and immobilized CalB W104A (5 mg) were dissolved in toluene (0.5 mL). Once heated to the desired temperature, isopropenyl acetate (83  $\mu$ L, 0.75 mmol) was added.

### **Kinetic resolution of 1-phenylheptanol**

**1a** (96 mg, 0.5 mmol) and immobilized CalB W104A (20 mg) were dissolved in toluene (1 mL). Once heated to the desired temperature, isopropenyl acetate (83  $\mu$ L, 0.75 mmol) was added.

### **General procedure for dynamic kinetic resolution of 1a and 1b**

Ru-catalyst **4** (16 mg, 0.025 mmol), CalB W104A (30 mg) and Na<sub>2</sub>CO<sub>3</sub> (53 mg, 0.5 mmol) were dissolved in dry toluene (0.5 mL) in a Schlenk-tube. <sup>t</sup>BuOK (0.025 mmol, 100  $\mu$ L of a 0.5 M solution in dry THF) was added. After 6 minutes of stirring, alcohol **1** (0.5 mmol in 0.5 mL toluene) was added, and after additional 4 minutes isopropenyl acetate (83  $\mu$ L, 0.75 mmol) was added. When the reaction was finished, the reaction mixture was filtered through a plug of silica and concentrated. Purification by flash column chromatography (Pentane/EtOAc 4:1) yielded the pure acetate **2**.

### **References**

---

<sup>1</sup> B. Martín-Matute, M. Edin, K. Bogár, F. B. Kaynak and J.-E. Bäckvall, *J. Am. Chem. Soc.*, 2005, **127**, 8817-8825.

<sup>2</sup> M. Vallin, P.-O. Syrén and K. Hult, *ChemBioChem*, 2010, **11**, 411-416.
